# Supplementary material for: Measuring Walking Speed Failed to Predict Early Death and Toxicity in Elderly Patients with Metastatic Non-Small-Cell Lung Cancer (NSCLC) Selected for Undergoing First-Line Systemic Treatment: An Observational Exploratory Study
Source: MDPI journal article supplement (doi:10.3390/cancers14051344), 2022-03-05
Supplement: s1 [file s1]

**Supplementary Table S1 Baseline characteristics of participants treated by chemo or immunotherapy with or without geriatric assessment**

| Characteristics                    | Geriatric Assessment |                  |         |
|------------------------------------|----------------------|------------------|---------|
|                                    | No<br>N = 19         | Yes<br>N = 38    | p-value |
| <b>Age, median (IQR)</b>           | 75 (73-78)           | 75 (72-79)       | 0.677   |
| <b>Male sex, n (%)</b>             | 15 (79)              | 32 (84)          | 0.622   |
| <b>Performance status</b>          |                      |                  |         |
| <b>0-1</b>                         | 8 (42)               | 22 (58)          | 0.260   |
| <b>2</b>                           | 11 (58)              | 16 (42)          |         |
| <b>Smokers, n (%)</b>              | 16 (84)              | 34 (90)          | 0.360   |
| <b>Pack years (IQR)</b>            | 48 (23-60)           | 50 (20-80)       | 0.325   |
| <b>Histology</b>                   |                      |                  |         |
| <b>Squamous, n (%)</b>             | 4 (21)               | 9 (24)           | 0.823   |
| <b>Non-squamous, n (%)</b>         | 15 (79)              | 29 (76)          |         |
| <b>Weight, Kg (IQR)</b>            | 71 (68-78)           | 75 (65.8-85)     | 0.678   |
| <b>BMI, Kg/m<sup>2</sup> (IQR)</b> | 24.4 (22.5-29.5)     | 26.6 (23.5-29.5) | 0.450   |
| <b>Plasma albumin, g/L (IQR)</b>   | 36 (31-38)           | 39 (33-43)       | 0.064   |

Quantitative variables were expressed using the median, the 1st and 3rd quartile (interquartile range= IQR), and categorical variables were given using the number and percentage, n (%). Quantitative variables were compared using the Wilcoxon test and categorical variables using the Chi-square or Fisher tests.
